# Supplementary material for: Evaluation of sparteine-like chiral diamines in the enantioselective lithiation–electrophilic trapping of an O-alkyl carbamate
Source: Royal Society of Chemistry journal article supplement (doi:10.1039/b600032k), 2006-01-01

Evaluation of sparteine-like chiral diamines in the enantioselective  
lithiation-electrophilic trapping of an *O*-alkyl carbamate

Cédric Genet, Matthew J. McGrath and Peter O'Brien\*

Department of Chemistry, University of York, Heslington, York YO10 5DD UK.

Fax: +44 1904 432165; Tel: +44 1904 432535; E-mail: [paob1@york.ac.uk](mailto:paob1@york.ac.uk)

**Supporting Information:**

Chiral HPLC chromatograms for (–)- and *rac*-*N*-benzyl cytosine **19** and chiral shift NMR spectra of (+)-sparteine surrogate **12**.

Chiral HPLC chromatograms for (–)- and *rac*-*N*-benzyl cytisine **19**.

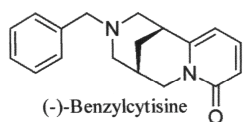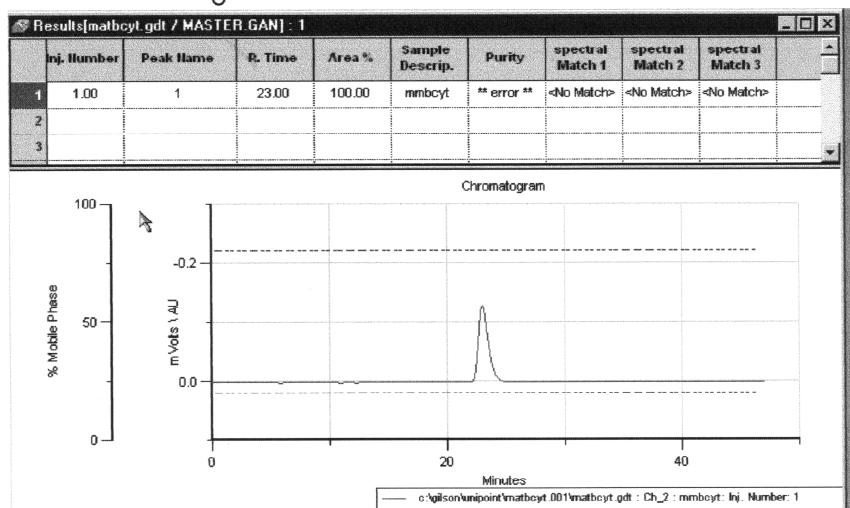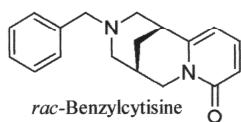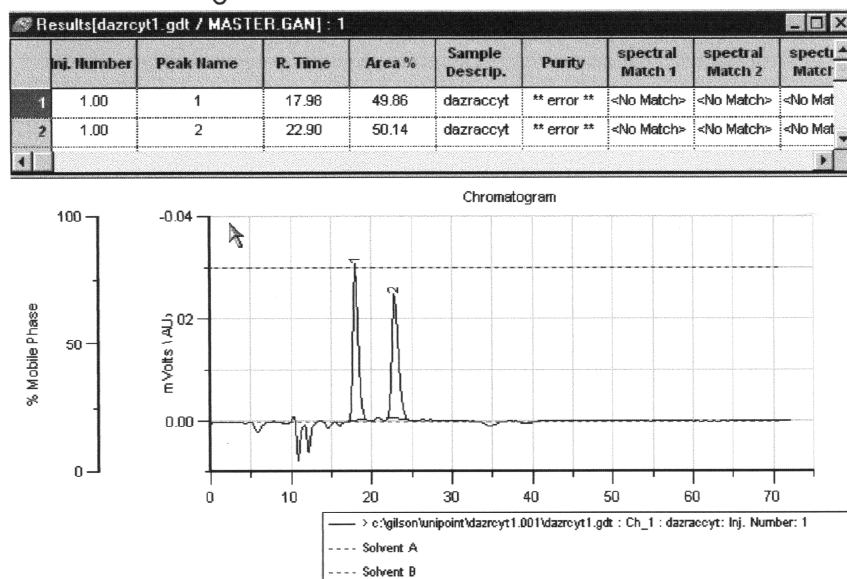

Chiral stationary phase HPLC was performed on a Gilson system with 712 controller software and a 118 UV/Vis diode array detector. Chiralcel OD, 20% *i*PrOH in heptane containing 0.1% Et<sub>2</sub>NH, 0.5 cm<sup>3</sup> min<sup>–1</sup>, 254 nm, 18 min [(1*R*,9*R*)-**19**], 23 min [(1*S*,9*S*)-**19**].

Selected portions of the  $^1\text{H}$  NMR spectra of (+)-sparteine surrogate **12** and 3 equiv. of (*S*)- or (*R*)-2,2,2-trifluoro-1-(9-anthryl)ethanol.

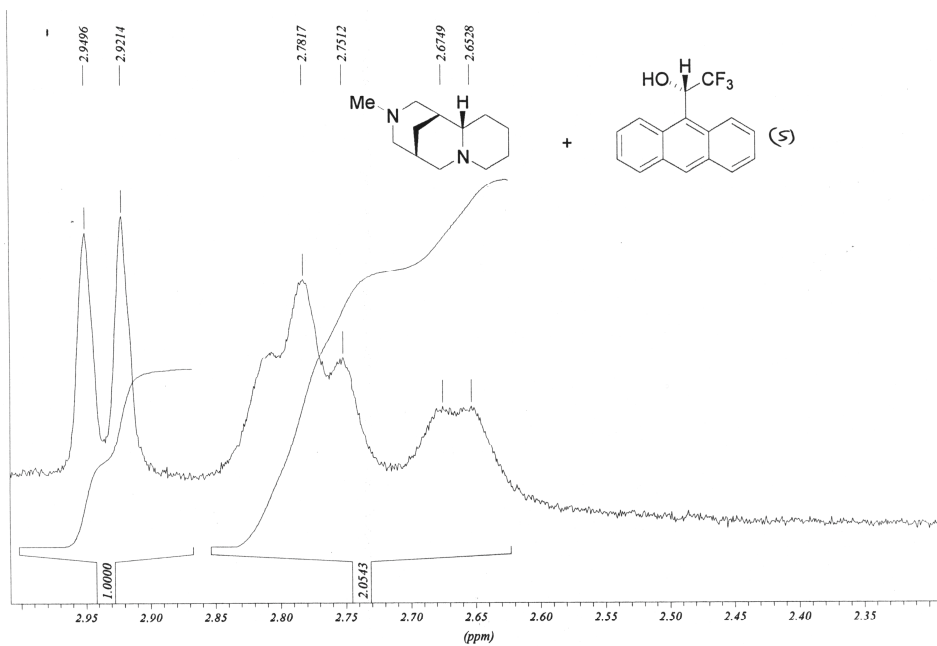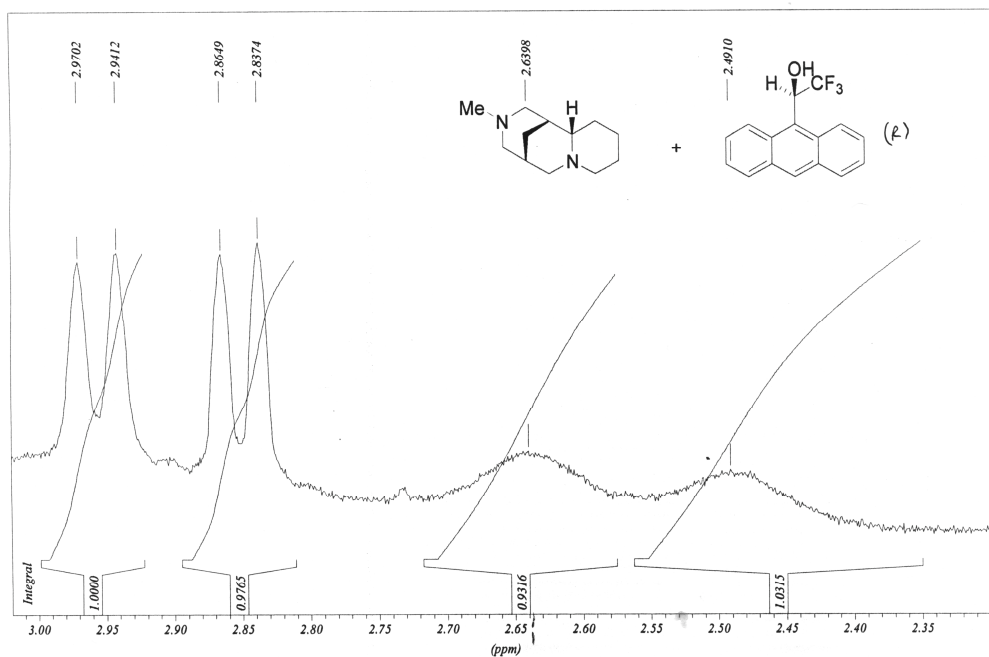

Selected portions of the  $^1\text{H}$  NMR spectra of (+)-sparteine surrogate **12** and 3 equiv. of (*S*)- or (*R*)-2,2,2-trifluoro-1-(9-anthryl)ethanol.

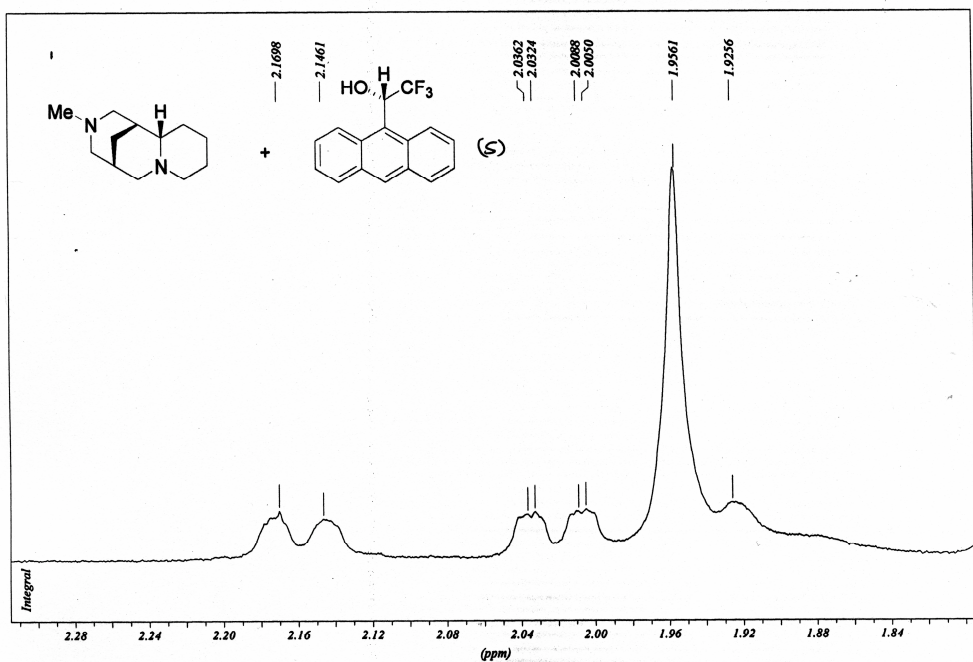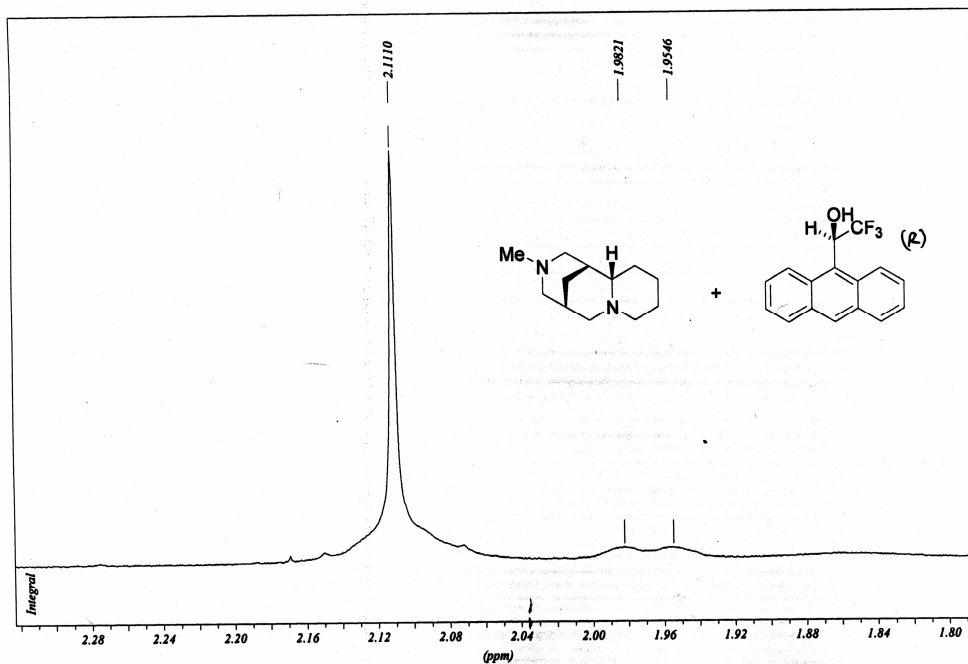

Supplement: b600032k.pdf [file b600032k.pdf]
